# Supplementary material
Source: ML conference proceedings conference paper supplement (https://proceedings.mlr.press/v80/han18a.html)
Supplement: Supplementary file 1 [file han18a-supp.pdf]

## Supplementary Material

### A. Proofs

In the theoretical analysis, we fix  $s_K(\mathbf{x}, \boldsymbol{\theta}) = 0$ . Then, we only need to consider  $\mathcal{C}_{\mathbf{x}} \cup \mathcal{N}_{\mathbf{x}} = \{1, \dots, K-1\}$ . Now, the normalization factor becomes

$$E(\mathbf{x}, j) = 1 + \sum_{k' \in \mathcal{C}_{\mathbf{x}}} e^{s_{k'}(\mathbf{x}, \boldsymbol{\theta})} + e^{s_j(\mathbf{x}, \boldsymbol{\theta})} / q_{\mathbf{x}}(j),$$

with some sampled class  $j \in \mathcal{N}_{\mathbf{x}}$ . Now, we can rewrite  $R$  and  $\hat{R}$  as

$$\begin{aligned} R(\boldsymbol{\theta}) &= \mathbb{E}_{\mathbf{x}} \sum_{k \in \mathcal{C}_{\mathbf{x}}} p(y = k | \mathbf{x}) \sum_{j \in \mathcal{N}_{\mathbf{x}}} q_{\mathbf{x}}(j) \log \frac{e^{s_k(\mathbf{x}, \boldsymbol{\theta})}}{E(\mathbf{x}, j)} + \sum_{k \in \mathcal{N}_{\mathbf{x}}} p(y = k | \mathbf{x}) \log \frac{e^{s_k(\mathbf{x}, \boldsymbol{\theta})}}{E(\mathbf{x}, k)} + p(y = K | \mathbf{x}) \sum_{j \in \mathcal{N}_{\mathbf{x}}} q_{\mathbf{x}}(j) \log \frac{1}{E(\mathbf{x}, j)}. \\ \hat{R}_n(\boldsymbol{\theta}) &= \frac{1}{n} \sum_{i=1}^n \left[ \sum_{k \in \mathcal{C}_{\mathbf{x}_i}} \mathbb{I}(y_i = k) \sum_{j \in \mathcal{C}_{\mathbf{x}_i}} q_{\mathbf{x}_i}(j) \log \frac{e^{s_k(\mathbf{x}_i, \boldsymbol{\theta})}}{E(\mathbf{x}_i, j)} + \sum_{k \in \mathcal{N}_{\mathbf{x}_i}} \mathbb{I}(y_i = k) \log \frac{e^{s_k(\mathbf{x}_i, \boldsymbol{\theta})}}{E(\mathbf{x}_i, k)} + \mathbb{I}(y_i = K) \sum_{j \in \mathcal{C}_{\mathbf{x}_i}} q_{\mathbf{x}_i}(j) \log \frac{1}{E(\mathbf{x}_i, j)} \right]. \end{aligned}$$

In the proofs, we will use point-wise notations  $p_k$ ,  $s_k$ ,  $q_k$  and  $E_k$  to represent  $p(y = k | \mathbf{x})$ ,  $s_k(\mathbf{x}, \boldsymbol{\theta})$ ,  $q_{\mathbf{x}}(k)$  and  $E(\mathbf{x}, k)$  for simplicity.

#### A.1. Useful Lemma

We will need the following lemma in our analysis.

**Lemma 1.** *For any norm  $\|\cdot\|$  defined on the parameter space of  $\boldsymbol{\theta}$ , assume the quantities  $\|\nabla_{\boldsymbol{\theta}} s_k\|$ ,  $\|\nabla_{\boldsymbol{\theta}}^2 s_k\|$  and  $\|\nabla_{\boldsymbol{\theta}}^3 s_k\|$  for  $k = 1, \dots, K-1$  are bounded. Then, for any compact set  $\mathbb{S}$  defined on the parameter space, we have*

$$\sup_{\boldsymbol{\theta} \in \mathbb{S}} |\hat{R}_n(\boldsymbol{\theta}) - R(\boldsymbol{\theta})| \xrightarrow{p} 0, \quad \sup_{\boldsymbol{\theta} \in \mathbb{S}} \|\nabla \hat{R}_n(\boldsymbol{\theta}) - \nabla R(\boldsymbol{\theta})\| \xrightarrow{p} 0, \quad \text{and} \quad \sup_{\boldsymbol{\theta} \in \mathbb{S}} \|\nabla^2 \hat{R}_n(\boldsymbol{\theta}) - \nabla^2 R(\boldsymbol{\theta})\| \xrightarrow{p} 0.$$

*Proof.* For fixed  $\boldsymbol{\theta}$ , let

$$\begin{aligned} \psi(\mathbf{x}, y, \boldsymbol{\theta}) &= \sum_{k \in \mathcal{C}_{\mathbf{x}}} \mathbb{I}(y = k) \sum_{j \in \mathcal{N}_{\mathbf{x}}} q_j \log \frac{e^{s_k}}{1 + \sum_{k' \in \mathcal{C}_{\mathbf{x}}} e^{s_{k'}} + \frac{e^{s_j}}{q_j}} + \mathbb{I}(y = K) \sum_{j \in \mathcal{N}_{\mathbf{x}}} q_j \log \frac{1}{1 + \sum_{k' \in \mathcal{C}_{\mathbf{x}}} e^{s_{k'}} + \frac{e^{s_j}}{q_j}} \\ &+ \sum_{k \in \mathcal{N}_{\mathbf{x}}} \mathbb{I}(y = k) \log \frac{e^{s_k}}{1 + \sum_{k' \in \mathcal{C}_{\mathbf{x}}} e^{s_{k'}} + \frac{e^{s_k}}{q_k}}. \end{aligned}$$

Then we have  $\hat{R}_n(\boldsymbol{\theta}) = \frac{1}{n} \sum_{i=1}^n \psi(\mathbf{x}_i, \mathbf{y}_i, \boldsymbol{\theta})$  and  $R(\boldsymbol{\theta}) = \mathbb{E}_{\mathbf{x}, y} \psi(\mathbf{x}, \mathbf{y}, \boldsymbol{\theta})$ . By the Law of Large Numbers, we know that  $\hat{R}_n(\boldsymbol{\theta})$  converges point-wisely to  $R(\boldsymbol{\theta})$  in probability.

According to the assumption, there exists a constant  $M > 0$  such that

$$\|\nabla_{\boldsymbol{\theta}} \psi(\mathbf{x}, y, \boldsymbol{\theta})\| \leq \sum_{k=1}^{K-1} \|\nabla_{\boldsymbol{\theta}} s_k\| \leq M.$$

Given any  $\epsilon > 0$ , we may find a finite cover  $\mathbb{S}_{\epsilon} \subset \mathbb{S}$  so that for any  $\boldsymbol{\theta} \in \mathbb{S}$ , there exists  $\boldsymbol{\theta}' \in \mathbb{S}_{\epsilon}$  such that  $|\psi(\mathbf{x}, \mathbf{y}, \boldsymbol{\theta}) - \psi(\mathbf{x}, \mathbf{y}, \boldsymbol{\theta}')| \leq M \|\boldsymbol{\theta} - \boldsymbol{\theta}'\| < \epsilon$ . Since  $\mathbb{S}_{\epsilon}$  is finite, as  $n \rightarrow \infty$ ,  $\sup_{\boldsymbol{\theta} \in \mathbb{S}_{\epsilon}} |\hat{R}_n(\boldsymbol{\theta}) - R(\boldsymbol{\theta})|$  converges to 0 in probability. Therefore, as  $n \rightarrow \infty$ , with probability 1, we have

$$\sup_{\boldsymbol{\theta} \in \mathbb{S}} |\hat{R}_n(\boldsymbol{\theta}) - R(\boldsymbol{\theta})| < 2\epsilon + \sup_{\boldsymbol{\theta} \in \mathbb{S}_{\epsilon}} |\hat{R}_n(\boldsymbol{\theta}) - R(\boldsymbol{\theta})| \rightarrow 2\epsilon.$$

Let  $\epsilon \rightarrow 0$ , we obtain the first bound. The second and the third bounds can be similarly obtained.  $\square$

#### A.2. Proof of Theorem 1

*Proof.*  $R$  can be re-written as

$$R = \mathbb{E}_{\mathbf{x}} \sum_{j \in \mathcal{N}_{\mathbf{x}}} q_j \left( \sum_{k \in \mathcal{C}_{\mathbf{x}}} p_k \log \frac{e^{s_k}}{1 + \sum_{k' \in \mathcal{C}_{\mathbf{x}}} e^{s_{k'}} + e^{s_j} / q_j} + p_K \log \frac{1}{1 + \sum_{k' \in \mathcal{C}_{\mathbf{x}}} e^{s_{k'}} + e^{s_j} / q_j} + \frac{p_j}{q_j} \log \frac{e^{s_j}}{1 + \sum_{k' \in \mathcal{C}_{\mathbf{x}}} e^{s_{k'}} + e^{s_j} / q_j} \right).$$

For  $i \in \mathcal{C}_{\mathbf{x}}$ , we have

$$\begin{aligned} \nabla_{s_i} R &= \mathbb{E}_{\mathbf{x}} \sum_{j \in \mathcal{N}_{\mathbf{x}}} q_j \left[ p_i \left( 1 - \frac{e^{s_i}}{1 + \sum_{k' \in \mathcal{C}_{\mathbf{x}}} e^{s_{k'}} + e^{s_j}/q_j} \right) - \sum_{k \neq i \in \mathcal{C}_{\mathbf{x}}} p_k \frac{e^{s_i}}{1 + \sum_{k' \in \mathcal{C}_{\mathbf{x}}} e^{s_{k'}} + e^{s_j}/q_j} \right. \\ &\quad \left. - p_K \frac{e^{s_i}}{1 + \sum_{k' \in \mathcal{C}_{\mathbf{x}}} e^{s_{k'}} + e^{s_j}/q_j} - p_j/q_j \frac{e^{s_i}}{1 + \sum_{k' \in \mathcal{C}_{\mathbf{x}}} e^{s_{k'}} + e^{s_j}/q_j} \right] \\ &= \mathbb{E}_{\mathbf{x}} \sum_{j \in \mathcal{N}_{\mathbf{x}}} q_j \left[ p_i - \left( p_K + \sum_{k \in \mathcal{C}_{\mathbf{x}}} p_k + p_j/q_j \right) \frac{e^{s_i}}{1 + \sum_{k' \in \mathcal{C}_{\mathbf{x}}} e^{s_{k'}} + e^{s_j}/q_j} \right]. \end{aligned}$$

Similarly, for  $j \in \mathcal{N}_{\mathbf{x}}$ , we have

$$\begin{aligned} \nabla_{s_j} R &= \mathbb{E}_{\mathbf{x}} q_j \left[ - \left( p_K + \sum_{k \in \mathcal{C}_{\mathbf{x}}} p_k \right) \frac{e^{s_j}/q_j}{1 + \sum_{k' \in \mathcal{C}_{\mathbf{x}}} e^{s_{k'}} + e^{s_j}/q_j} + p_j/q_j \left( 1 - \frac{e^{s_j}/q_j}{1 + \sum_{k' \in \mathcal{C}_{\mathbf{x}}} e^{s_{k'}} + e^{s_j}/q_j} \right) \right] \\ &= \mathbb{E}_{\mathbf{x}} p_j - \left( p_K + \sum_{k \in \mathcal{C}_{\mathbf{x}}} p_k + p_j/q_j \right) \frac{e^{s_j}}{1 + \sum_{k' \in \mathcal{C}_{\mathbf{x}}} e^{s_{k'}} + e^{s_j}/q_j}. \end{aligned}$$

By measuring  $s_k = \log \frac{p_k}{p_K}$ , we see that  $\nabla_{s_k} R = 0$  for  $k = 1, \dots, K-1$ . Therefore,  $s_k = \log \frac{p_k}{p_K}$  is an extrema of  $R$ . Now, for  $i, i' \in \mathcal{C}_{\mathbf{x}}$  and  $j, j' \in \mathcal{N}_{\mathbf{x}}$ , we have

$$\begin{aligned} \mathbb{H}_{ii} &= \nabla_{s_i s_i}^2 R = -\mathbb{E}_{\mathbf{x}} \sum_{j \in \mathcal{N}_{\mathbf{x}}} q_j D_j \frac{e^{s_i} (E_j - e^{s_i})}{E_j^2}, \\ \mathbb{H}_{ii'} &= \nabla_{s_i s_{i'}}^2 R = \mathbb{E}_{\mathbf{x}} \sum_{j \in \mathcal{N}_{\mathbf{x}}} q_j D_j \frac{e^{s_i} e^{s_{i'}}}{E_j^2}, \\ \mathbb{H}_{ij} &= \mathbb{H}_{ji} = \nabla_{s_i s_j}^2 R = \nabla_{s_j s_i}^2 R = \mathbb{E}_{\mathbf{x}} \sum_{j \in \mathcal{N}_{\mathbf{x}}} D_j \frac{e^{s_i} e^{s_j}}{E_j^2}, \\ \mathbb{H}_{jj} &= \nabla_{s_j s_j}^2 R = -\mathbb{E}_{\mathbf{x}} D_j \frac{e^{s_j} (E_j - e^{s_j}/q_j)}{E_j^2}, \\ \mathbb{H}_{jj'} &= \nabla_{s_j s_{j'}}^2 R = 0, \end{aligned}$$

where

$$D_j = p_K + \sum_{k' \in \mathcal{C}_{\mathbf{x}}} p_{k'} + p_j/q_j.$$

Now, we can write

$$\begin{aligned} \nabla_s^2 R &= \begin{bmatrix} \mathbb{H}_{i_1 i_1} & \cdots & \mathbb{H}_{i_1 i_1 | \mathcal{C}_{\mathbf{x}} |} & 0 & \cdots & \mathbb{H}_{i_1 j} & \cdots & 0 \\ \cdots & \cdots \\ \mathbb{H}_{i_1 | \mathcal{C}_{\mathbf{x}} | i_1} & \cdots & \mathbb{H}_{i_1 | \mathcal{C}_{\mathbf{x}} | i_1 | \mathcal{C}_{\mathbf{x}} |} & 0 & \cdots & \mathbb{H}_{i_1 | \mathcal{C}_{\mathbf{x}} | j} & \cdots & 0 \\ \hline 0 & \cdots & 0 & 0 & \cdots & 0 & \cdots & 0 \\ \cdots & \cdots \\ \mathbb{H}_{j i_1} & \cdots & \mathbb{H}_{j i_1 | \mathcal{C}_{\mathbf{x}} |} & 0 & \cdots & \mathbb{H}_{j j} & \cdots & 0 \\ \cdots & \cdots \\ 0 & \cdots & 0 & 0 & \cdots & 0 & \cdots & 0 \end{bmatrix} \\ &= -\mathbb{E}_{\mathbf{x}} \sum_{j \in \mathcal{N}_{\mathbf{x}}} q_j \frac{D_j}{E_j} \left[ \text{diag}(\mathbf{v}_j) - \frac{1}{E_j} \mathbf{v}_j \mathbf{v}_j^\top \right]. \end{aligned}$$

where  $\mathbf{v}_j = (e^{s_{i_1}}, \dots, e^{s_{i_1 | \mathcal{C}_{\mathbf{x}} |}}, 0, \dots, e^{s_j}/q_j, \dots, 0)^\top$ . Let

$$\mathbf{A}_j = \text{diag}(\mathbf{v}_j) - \frac{1}{E_j} \mathbf{v}_j \mathbf{v}_j^\top.$$

For any non-zero vector  $\boldsymbol{\varphi} = (\varphi_1, \dots, \varphi_{K-1})^\top \in \mathbb{R}^{K-1}$ , we have

$$\boldsymbol{\varphi}^\top \mathbf{A}_j \boldsymbol{\varphi} = \sum_{i \in \mathcal{C}_{\mathbf{x}}} e^{s_i} \varphi_i^2 + \frac{e^{s_j}}{q_j} \varphi_j^2 - \frac{1}{E_j} \left( \sum_{i \in \mathcal{C}_{\mathbf{x}}} e^{s_i} \varphi_i + \frac{e^{s_j}}{q_j} \varphi_j \right)^2 \geq \frac{\left( \sum_{i \in \mathcal{C}_{\mathbf{x}}} e^{s_i} \varphi_i + \frac{e^{s_j}}{q_j} \varphi_j \right)^2}{\sum_{i \in \mathcal{C}_{\mathbf{x}}} e^{s_i} + \frac{e^{s_j}}{q_j}} - \frac{1}{E_j} \left( \sum_{i \in \mathcal{C}_{\mathbf{x}}} e^{s_i} \varphi_i + \frac{e^{s_j}}{q_j} \varphi_j \right)^2 > 0,$$

for every  $j \in \mathcal{N}_{\mathbf{x}}$ , where the first inequality is by the Cauchy-Schwarz inequality and the second inequality is because  $0 < \sum_{i \in \mathcal{C}_{\mathbf{x}}} e^{s_i} + \frac{e^{s_j}}{q_j} < E_j$ . Therefore,  $-\nabla_s^2 R = \mathbb{E}_{\mathbf{x}} \sum_{j \in \mathcal{N}_{\mathbf{x}}} q_j \frac{D_j}{E_j} \mathbf{A}_j$  is positive-definite and  $R$  is strongly concave with respect to  $s$ . Hence,  $s_k = \log \frac{p_k}{p_K}$  for  $k = 1, \dots, K-1$  is the only maxima of  $R$ .  $\square$

### A.3. Proof of Theorem 2

*Proof.*  $R$  can be re-written as

$$R(\boldsymbol{\theta}) = \mathbb{E}_{\mathbf{x}} \sum_{k \in \mathcal{C}_{\mathbf{x}}} p_k \sum_{j \in \mathcal{N}_{\mathbf{x}}} q_j \log \frac{e^{s_k}}{E_j} + \sum_{k \in \mathcal{N}_{\mathbf{x}}} p_k \log \frac{e^{s_k}}{E_k} + p_K \sum_{j \in \mathcal{N}_{\mathbf{x}}} q_j \log \frac{1}{E_j}.$$

Note that  $E_j$  for any  $j$  can be viewed as a function of  $\mathbf{s} = (s_1, \dots, s_{K-1})^\top$ . Define the following function

$$G(\mathbf{s}) = \sum_{k \in \mathcal{C}_{\mathbf{x}}} p_k \sum_{j \in \mathcal{N}_{\mathbf{x}}} q_j \log E_j + \sum_{k \in \mathcal{N}_{\mathbf{x}}} p_k \log E_k + p_K \sum_{j \in \mathcal{N}_{\mathbf{x}}} q_j \log E_j,$$

then for any  $\boldsymbol{\theta} \neq \boldsymbol{\theta}^*$ ,

$$\begin{aligned} R(\boldsymbol{\theta}^*) - R(\boldsymbol{\theta}) &= \mathbb{E}_{\mathbf{x}} \sum_{k \in \mathcal{C}_{\mathbf{x}}} p_k \sum_{j \in \mathcal{N}_{\mathbf{x}}} q_j \left( \log \frac{E_j}{E_j^*} + s_k^* - s_k \right) + \sum_{k \in \mathcal{N}_{\mathbf{x}}} p_k \left( \log \frac{E_k}{E_k^*} + s_k^* - s_k \right) + p_K \sum_{j \in \mathcal{N}_{\mathbf{x}}} q_j \log \frac{E_j}{E_j^*} \\ &= \mathbb{E}_{\mathbf{x}} \sum_{k \in \mathcal{C}_{\mathbf{x}}} p_k \sum_{j \in \mathcal{N}_{\mathbf{x}}} q_j \log \frac{E_j}{E_j^*} + \sum_{k \in \mathcal{N}_{\mathbf{x}}} p_k \log \frac{E_k}{E_k^*} + p_K \sum_{j \in \mathcal{N}_{\mathbf{x}}} q_j \log \frac{E_j}{E_j^*} + \sum_{k=1}^{K-1} p_k (s_k^* - s_k) \\ &= G(\mathbf{s}) - G(\mathbf{s}^*) - \nabla G(\mathbf{s}^*)^\top (\mathbf{s} - \mathbf{s}^*) = \Delta(\mathbf{s}, \mathbf{s}^*), \end{aligned}$$

where  $\Delta(\mathbf{s}, \mathbf{s}^*)$  is the Bregman divergence of the convex function  $G(\mathbf{s})$ . Since  $G(\cdot)$  is convex, we have  $\Delta(\mathbf{s}, \mathbf{s}^*) \geq 0$  and  $\Delta(\mathbf{s}, \mathbf{s}^*) = 0$  only when  $\mathbf{s} = \mathbf{s}^*$ . Under the assumption that the parameter space is compact and  $\forall \boldsymbol{\theta} \neq \boldsymbol{\theta}^*$  we have  $\mathbb{P}_{\mathcal{X}}(s_k(\mathbf{x}, \boldsymbol{\theta}) \neq s_k(\mathbf{x}, \boldsymbol{\theta}^*)) > 0$  for  $k \neq K$ , we know that  $R(\boldsymbol{\theta}) < R(\boldsymbol{\theta}^*)$  for any  $\boldsymbol{\theta} \neq \boldsymbol{\theta}^*$ .

Given any  $\varepsilon' > 0$ , there exists  $\varepsilon > 0$  that  $R(\boldsymbol{\theta}^*) - R(\boldsymbol{\theta}) < \varepsilon$  implies  $\|\boldsymbol{\theta}^* - \boldsymbol{\theta}\| < \varepsilon'$ . Now according to Lemma 1, there exists a  $\delta > 0$ , when  $n \rightarrow \infty$ , we have

$$\begin{aligned} R(\boldsymbol{\theta}^*) - R(\hat{\boldsymbol{\theta}}) &= R(\boldsymbol{\theta}^*) - \hat{R}_n(\boldsymbol{\theta}^*) + \hat{R}_n(\boldsymbol{\theta}^*) - R(\hat{\boldsymbol{\theta}}) \leq R(\boldsymbol{\theta}^*) - \hat{R}_n(\boldsymbol{\theta}^*) + \hat{R}_n(\hat{\boldsymbol{\theta}}) - R(\hat{\boldsymbol{\theta}}) \\ &\leq |R(\boldsymbol{\theta}^*) - \hat{R}_n(\boldsymbol{\theta}^*)| + |\hat{R}_n(\hat{\boldsymbol{\theta}}) - R(\hat{\boldsymbol{\theta}})| < 2\delta. \end{aligned}$$

This implies that  $\|\hat{\boldsymbol{\theta}} - \boldsymbol{\theta}^*\| < \delta'$  for any  $\delta' > 0$ .  $\square$

### A.4. Proof of Theorem 3

*Proof.* By the Mean Value Theorem, we have

$$\sqrt{n}(\hat{\boldsymbol{\theta}} - \boldsymbol{\theta}^*) = -\nabla^2 \hat{R}_n(\bar{\boldsymbol{\theta}})^{-1} \sqrt{n} \nabla \hat{R}_n(\boldsymbol{\theta}^*), \quad (12)$$

where  $\bar{\boldsymbol{\theta}} = t\boldsymbol{\theta}^* + (1-t)\hat{\boldsymbol{\theta}}$  for some  $t \in [0, 1]$ . Note that Lemma 1 implies that  $\nabla^2 \hat{R}_n(\bar{\boldsymbol{\theta}})^{-1}$  converges to  $\nabla^2 R(\bar{\boldsymbol{\theta}})^{-1}$  in probability; moreover,  $\hat{\boldsymbol{\theta}} \rightarrow \boldsymbol{\theta}^*$  in probability and hence  $\bar{\boldsymbol{\theta}} \rightarrow \boldsymbol{\theta}^*$  in probability. By the Slutsky's Theorem, the limit distribution of  $\sqrt{n}(\hat{\boldsymbol{\theta}} - \boldsymbol{\theta}^*)$  is given by

$$-\nabla^2 R(\boldsymbol{\theta}^*)^{-1} \sqrt{n} \nabla \hat{R}_n(\boldsymbol{\theta}^*).$$

Observe that  $\sqrt{n} \nabla \hat{R}_n(\boldsymbol{\theta}^*)$  is the sum of  $n$  i.i.d. random vectors with mean  $\mathbb{E} \sqrt{n} \nabla \hat{R}_n(\boldsymbol{\theta}^*) = \sqrt{n} \mathbb{E} \nabla R(\boldsymbol{\theta}^*) = 0$ , and the variance of  $\sqrt{n}(\hat{\boldsymbol{\theta}} - \boldsymbol{\theta}^*)$  is

$$\text{Var} \left( \sqrt{n}(\hat{\boldsymbol{\theta}} - \boldsymbol{\theta}^*) \right) = \nabla^2 R(\boldsymbol{\theta}^*)^{-1} \text{Var} \left( \sqrt{n} \nabla \hat{R}_n(\boldsymbol{\theta}^*) \right) \nabla^2 R(\boldsymbol{\theta}^*)^{-1}.$$

From the proof of Theorem 1, we have

$$\nabla^2 R(\boldsymbol{\theta}) = -\mathbb{E}_{\mathbf{x}} \nabla \left[ \sum_{j \in \mathcal{N}_{\mathbf{x}}} q_j \frac{D_j}{E_j} \mathbf{A}_j \right] \nabla^\top, \quad (13)$$

where

$$\nabla = \text{diag} \left( \left( \nabla_{i_1}, \dots, \nabla_{i_{|C_{\mathbf{x}}|}}, \nabla_{j_1}, \dots, \nabla_{j_{|\mathcal{N}_{\mathbf{x}}|}} \right)^\top \right)$$

and  $\nabla_k = \nabla_{\boldsymbol{\theta}} s_k$ .

Measuring  $\nabla^2 R(\boldsymbol{\theta})$  at  $\boldsymbol{\theta}^*$ , we have

$$\nabla^2 R(\boldsymbol{\theta}^*) = -\mathbb{E}_{\mathbf{x}} \nabla \mathbf{M} \nabla^\top \quad (14)$$

where

$$\mathbf{M} = \sum_{j \in \mathcal{N}_{\mathbf{x}}} q_j \left[ \text{diag}(\mathbf{u}_j) - \frac{1}{D_j} \mathbf{u}_j \mathbf{u}_j^\top \right],$$

where  $\mathbf{u}_j = (p_{i_1}, \dots, p_{i_{|C_{\mathbf{x}}|}}, 0, \dots, p_j/q_j, \dots, 0)^\top$ . By following the proof of Theorem 1, it is easy to show that  $\mathbf{M} \succ 0$  is positive definite.

Next, we derive  $\text{Var} \left( \sqrt{n} \nabla \hat{R}_n(\boldsymbol{\theta}^*) \right)$ . Introduce some Bernoulli variables  $Q_j$  for  $j \in \mathcal{N}_{\mathbf{x}}$  with  $p(Q_j = 1 | \mathbf{x}) = q_j$ . Now, for  $i, i' \in C_{\mathbf{x}}$  and  $j, j' \in \mathcal{N}_{\mathbf{x}}$ , we have

$$\begin{aligned} \mathbb{V}_{ii} &= \text{Var} \left( \nabla_i \hat{R}_n(\boldsymbol{\theta}^*), \nabla_i \hat{R}_n(\boldsymbol{\theta}^*) \right) \\ &= \mathbb{E}_{\mathbf{x}, Q} Q \left[ p_i \left( 1 - \frac{e^{s_i^*}}{1 + \sum_{k' \in C_{\mathbf{x}}} e^{s_{k'}^*} + e^{s_j^*}/q_j} \right)^2 + (D_j - p_i) \left( \frac{e^{s_i^*}}{1 + \sum_{k' \in C_{\mathbf{x}}} e^{s_{k'}^*} + e^{s_j^*}/q_j} \right)^2 \right] \cdot \nabla_i \nabla_i^\top \\ &= \mathbb{E}_{\mathbf{x}} \sum_{j \in \mathcal{N}_{\mathbf{x}}} q_j \frac{p_i (D_j - p_i)}{D_j} \cdot \nabla_i \nabla_i^\top, \end{aligned}$$

$$\begin{aligned} \mathbb{V}_{i i'} &= \text{Var} \left( \nabla_i \hat{R}_n(\boldsymbol{\theta}^*), \nabla_{i'} \hat{R}_n(\boldsymbol{\theta}^*) \right) = \mathbb{E}_{\mathbf{x}, Q} Q \left[ (D_j - p_i - p_{i'}) \frac{p_i p_{i'}}{D_j^2} - p_i \left( 1 - \frac{p_i}{D_j} \right) \frac{p_{i'}}{D_j} - p_{i'} \left( 1 - \frac{p_{i'}}{D_j} \right) \frac{p_i}{D_j} \right] \cdot \nabla_i \nabla_{i'}^\top \\ &= -\mathbb{E}_{\mathbf{x}} \sum_{j \in \mathcal{N}_{\mathbf{x}}} q_j \frac{p_i p_{i'}}{D_j} \cdot \nabla_i \nabla_{i'}^\top. \end{aligned}$$

$$\begin{aligned} \mathbb{V}_{jj} &= \text{Var} \left( \nabla_j \hat{R}_n(\boldsymbol{\theta}^*), \nabla_j \hat{R}_n(\boldsymbol{\theta}^*) \right) = \mathbb{E}_{\mathbf{x}, Q} Q \left[ \frac{p_j}{q_j} \left( 1 - \frac{p_j/q_j}{D_j} \right)^2 + (D_j - p_j/q_j) \frac{p_j^2/q_j^2}{D_j^2} \right] \cdot \nabla_j \nabla_j^\top \\ &= \mathbb{E}_{\mathbf{x}} \sum_{j \in \mathcal{N}_{\mathbf{x}}} \frac{p_j (D_j - p_j/q_j)}{D_j} \cdot \nabla_j \nabla_j^\top. \end{aligned}$$

$$\mathbb{V}_{j j'} = \mathbf{0}.$$

$$\begin{aligned} \mathbb{V}_{ij} &= \mathbb{V}_{ji} = \text{Var} \left( \nabla_i \hat{R}_n(\boldsymbol{\theta}^*), \nabla_j \hat{R}_n(\boldsymbol{\theta}^*) \right) \\ &= \mathbb{E}_{\mathbf{x}, Q} Q \left[ (D_j - p_i - p_j/q_j) \frac{p_i p_j/q_j}{D_j^2} - p_i \left( 1 - \frac{p_i}{D_j} \right) \frac{p_j/q_j}{D_j} - p_j/q_j \left( 1 - \frac{p_j/q_j}{D_j} \right) \frac{p_i}{D_j} \right] \cdot \nabla_i \nabla_j^\top \\ &= -\mathbb{E}_{\mathbf{x}} \sum_{j \in \mathcal{N}_{\mathbf{x}}} \frac{p_i p_j}{D_j} \cdot \nabla_i \nabla_j^\top. \end{aligned}$$

Now, the variance can be written as

$$V(\boldsymbol{\theta}^*) = \text{Var} \left( \sqrt{n} \nabla \hat{R}_n(\boldsymbol{\theta}^*) \right)$$

$$= \begin{bmatrix} \mathbb{V}_{i_1 i_1} & \cdots & \mathbb{V}_{i_1 i_{|C_{\mathbf{x}}|}} & 0 & \cdots & \mathbb{V}_{i_1 j} & \cdots & 0 \\ \cdots & \cdots \\ \mathbb{V}_{i_{|C_{\mathbf{x}}|} i_1} & \cdots & \mathbb{V}_{i_{|C_{\mathbf{x}}|} i_{|C_{\mathbf{x}}|}} & 0 & \cdots & \mathbb{V}_{i_{|C_{\mathbf{x}}|} j} & \cdots & 0 \\ \hline 0 & \cdots & 0 & 0 & \cdots & 0 & \cdots & 0 \\ \cdots & \cdots \\ \mathbb{V}_{j i_1} & \cdots & \mathbb{V}_{j i_{|C_{\mathbf{x}}|}} & 0 & \cdots & \mathbb{V}_{j j} & \cdots & 0 \\ \cdots & \cdots \\ 0 & \cdots & 0 & 0 & \cdots & 0 & \cdots & 0 \end{bmatrix}.$$

By comparing  $\nabla^2 R(\boldsymbol{\theta}^*)$  and  $V(\boldsymbol{\theta}^*)$ , we immediately have  $-\nabla^2 R(\boldsymbol{\theta}^*) = V(\boldsymbol{\theta}^*)$  and hence

$$\text{Var} \left( \sqrt{n}(\hat{\boldsymbol{\theta}} - \boldsymbol{\theta}^*) \right) = \left[ \mathbb{E}_{\mathbf{x}} \nabla \mathbf{M} \nabla^\top \right]^{-1}.$$

□

### A.5. Proof of Corollary 1

*Proof.* By following the proof of Theorem 3, it is easy to show that the statistical variance of the softmax logistic regression in Eq. (1) is  $[\mathbb{E}_{\mathbf{x}} \nabla \mathbf{M}^{mle} \nabla^\top]^{-1}$  (with  $s_K = 0$  fixed), where

$$\mathbf{M}^{mle} = \text{diag} \left( \begin{bmatrix} p_1 \\ \vdots \\ p_{K-1} \end{bmatrix} \right) - \begin{bmatrix} p_1 \\ \vdots \\ p_{K-1} \end{bmatrix} \begin{bmatrix} p_1 \\ \vdots \\ p_{K-1} \end{bmatrix}^\top.$$

When  $\sum_{k \in C_{\mathbf{x}} \cup \{K\}} p(k, \mathbf{x}) \rightarrow 1$ , we have  $\sum_{j' \in \mathcal{N}_{\mathbf{x}}} p_{j'} \rightarrow 0$  and  $D_j \rightarrow 1$ . Then,

$$\mathbf{M} = \text{diag} \left( \begin{bmatrix} p_{i_1} \\ \vdots \\ p_{i_{|C_{\mathbf{x}}|}} \\ p_{j_1} \\ \vdots \\ p_{j_{|\mathcal{N}_{\mathbf{x}}|}} \end{bmatrix} \right) - \begin{bmatrix} p_{i_1} p_{i_1} & \cdots & p_{i_1} p_{i_{|C_{\mathbf{x}}|}} & p_{i_1} \sum_{j' \in \mathcal{N}_{\mathbf{x}}} p_{j'} & \cdots & p_{i_1} \sum_{j' \in \mathcal{N}_{\mathbf{x}}} p_{j'} \\ \cdots & \cdots & \cdots & \cdots & \cdots & \cdots \\ p_{i_{|C_{\mathbf{x}}|}} p_{i_1} & \cdots & p_{i_{|C_{\mathbf{x}}|}} p_{i_{|C_{\mathbf{x}}|}} & p_{i_{|C_{\mathbf{x}}|}} \sum_{j' \in \mathcal{N}_{\mathbf{x}}} p_{j'} & \cdots & p_{i_{|C_{\mathbf{x}}|}} \sum_{j' \in \mathcal{N}_{\mathbf{x}}} p_{j'} \\ \hline p_{i_1} \sum_{j' \in \mathcal{N}_{\mathbf{x}}} p_{j'} & \cdots & p_{i_{|C_{\mathbf{x}}|}} \sum_{j' \in \mathcal{N}_{\mathbf{x}}} p_{j'} & p_{j_1}^2 / q_{j_1} & \cdots & 0 \\ \cdots & \cdots & \cdots & \cdots & \cdots & \cdots \\ p_{i_1} \sum_{j' \in \mathcal{N}_{\mathbf{x}}} p_{j'} & \cdots & p_{i_{|C_{\mathbf{x}}|}} \sum_{j' \in \mathcal{N}_{\mathbf{x}}} p_{j'} & 0 & \cdots & p_{j_{|\mathcal{N}_{\mathbf{x}}|}}^2 / q_{j_{|\mathcal{N}_{\mathbf{x}}|}} \end{bmatrix}.$$

If we arrange the index order in  $\mathbf{M}^{mle}$  according to the index order in  $\mathbf{M}$  and denote  $\boldsymbol{\Delta} = \mathbf{M} - \mathbf{M}^{mle}$ , we have

$$\boldsymbol{\Delta} = \begin{bmatrix} \boldsymbol{\Delta}_1 & \boldsymbol{\Delta}_2 \\ \boldsymbol{\Delta}_2^\top & \boldsymbol{\Delta}_3 \end{bmatrix} \rightarrow \mathbf{0},$$

because

$$\begin{aligned} \boldsymbol{\Delta}_1 &= \mathbf{0}, \\ \boldsymbol{\Delta}_2 &= \begin{bmatrix} p_{i_1} (p_{j_1} - \sum_{j' \in \mathcal{N}_{\mathbf{x}}} p_{j'}) & \cdots & p_{i_1} (p_{j_{|\mathcal{N}_{\mathbf{x}}|}} - \sum_{j' \in \mathcal{N}_{\mathbf{x}}} p_{j'}) \\ \cdots & \cdots & \cdots \\ p_{i_{|C_{\mathbf{x}}|}} (p_{j_1} - \sum_{j' \in \mathcal{N}_{\mathbf{x}}} p_{j'}) & \cdots & p_{i_{|C_{\mathbf{x}}|}} (p_{j_{|\mathcal{N}_{\mathbf{x}}|}} - \sum_{j' \in \mathcal{N}_{\mathbf{x}}} p_{j'}) \end{bmatrix} \rightarrow \mathbf{0}, \\ \boldsymbol{\Delta}_3 &= \begin{bmatrix} p_{j_1}^2 (1 - 1/q_{j_1}) & \cdots & p_{j_1} p_{j_{|\mathcal{N}_{\mathbf{x}}|}} \\ \cdots & \cdots & \cdots \\ p_{j_{|\mathcal{N}_{\mathbf{x}}|}} p_{j_1} & \cdots & p_{j_{|\mathcal{N}_{\mathbf{x}}|}}^2 (1 - 1/q_{j_{|\mathcal{N}_{\mathbf{x}}|}}) \end{bmatrix} \rightarrow \mathbf{0}. \end{aligned}$$

This completes the proof. □

## B. The Beam Search Algorithm

The beam search algorithm used in both training and testing is depicted in Algorithm 3.

---

### Algorithm 3 The Beam Search Algorithm.

---

```

1: Input: The root of the tree, input data point  $x$  and Beam width  $J$ .
2: Output: The  $J$  candidate classes.

3: Initialize stack  $\mathcal{S} \leftarrow root$  and stack  $\mathcal{S}' \leftarrow \emptyset$ ;
4: Initialize the candidate class set  $\mathcal{E} \leftarrow \emptyset$ ;
5: while true do
6:   if  $\mathcal{S}$  is empty then
7:     Break;
8:   end if
9:   for  $i = 1$  to  $\mathcal{S}.size()$  do
10:    if  $\mathcal{S}_i$  is a leaf then
11:       $\mathcal{E}.pushback(\mathcal{S}_i)$ ;
12:    else
13:      for  $c = 1$  to  $\mathcal{S}_i.Child.size()$  do
14:        Accumulate the score to  $\mathcal{S}_i.Child(c)$ ;
15:         $\mathcal{S}'.pushback(\mathcal{S}_i.Child(c))$ ;
16:      end for
17:    end if
18:  end for
19:   $\mathcal{S}.clear()$ ;
20:  if  $\mathcal{S}'.size() > J$  then
21:    // Using the max heap.
22:    Find the top- $J$  nodes with the highest accumulated scores in  $\mathcal{S}'$  and push them into  $\mathcal{S}$ ;
23:  else
24:     $\mathcal{S} \leftarrow \mathcal{S}'$ ;
25:  end if
26:   $\mathcal{S}'.clear()$ ;
27: end while
28: // Using the max heap.
29: Return the top- $J$  classes with the highest scores in  $\mathcal{E}$ ;

```

---

## C. A Hierarchical Clustering Method for Generating the Tree Structure

Given the data points of a dataset, we can obtain the center, i.e., the average data point, of each class by scanning the data once and get  $\bar{X} \in \mathbb{R}^{K \times d}$ , where  $K$  is the number of classes and  $d$  is the feature dimension. Then, a hierarchical clustering algorithm in Algorithm 4 is performed by viewing each row of  $\bar{X}$  as a separate data point. In Algorithm 4, the function ‘Split(root)’ in step 16 has already constructed a  $b$ -nary tree, which can be used by the Beam Tree Algorithm. However, the clustering algorithm, e.g., the  $k$ -means algorithm, may generate imbalanced clusters in step 9, and the resulting  $b$ -nary tree in step 16 may be imbalanced and affect the efficiency of Beam Tree. A simple way to fix this problem is to fetch the labels (leaves) in the tree in step 16 from left to right, where the obtained label order maintains a rough similarity relationship among the classes. We then assign the ordered labels to the leaves of a new balanced  $b$ -nary tree from left to right.

## D. Experimental Details

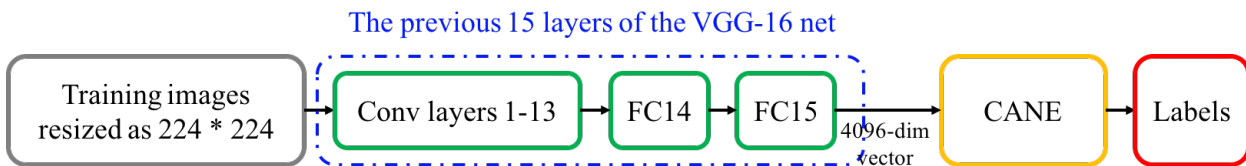

Figure 4. The neural network structure used for the ImageNet datasets. ‘FC’ indicates fully-connected layer.

---

**Algorithm 4** A Hierarchical Clustering Algorithm for Generating the Tree over Class Labels.

---

```

1: Input:  $K, b$  and  $\bar{X}$ .
2: Output: a  $b$ -nary tree.

3: Function Split(node  $o$ )
4: while true do
5:   if  $o$  is assigned with only one label then
6:      $o.isleaf = true$ ;
7:     Return;
8:   end if
9:   Perform any clustering algorithm, e.g., k-means, on the labels associated with the node  $o$  and obtain  $b$  clusters  $\{\mathcal{L}_1, \dots, \mathcal{L}_b\}$ ;
10:  Split  $o$  into  $b$  children  $\{o_1, \dots, o_b\}$  and assign the label clusters  $\{\mathcal{L}_1, \dots, \mathcal{L}_b\}$  to them respectively;
11:  for  $i = 1$  to  $b$  do
12:    Split( $o_i$ );
13:  end for
14: end while

15: Assign root with all labels  $\{1, 2, \dots, K\}$ ;
16: Split(root);
17: Get the label order in the leaves from left to right;
18: Assign the labels to the leaves of a new balanced  $b$ -nary tree from left to right;
19: Return the balanced  $b$ -nary tree;

```

---

Hyper-parameter tuning is computationally expensive. In order to efficiently select a good setting of the hyper-parameters, we let each method process half epoch of the training data and use another 10% held-out subset of the training set to tune hyper-parameters. For every classifier, the learning rate  $\eta$  needs to be tuned. For the LOMTree method, by following (Choromanska & Langford, 2015), we choose the number of the internal nodes in its binary tree from a set  $\{K - 1, 4K - 1, 16K - 1, 64K - 1\}$ , and tune the swap resistance from  $\{4, 16, 64, 256\}$ . The Recall Tree method has a default setting for large class problem in (Daume III et al., 2017), which is also adopted in the experiments.

The VGG-16 network structure used in ImageNet-2010 and ImageNet-10K datasets is provided in Fig. 4. Parameters of Conv layers 1-13, FC14 and FC15 are pre-trained on the ImageNet 2012 dataset.
